# Supplementary material for: FUT8-mediated aberrant N-glycosylation of B7H3 suppresses the immune response in triple-negative breast cancer
Source: PubMed Central journal article supplement (PMC8113546; doi:10.1038/s41467-021-22618-x), 2021-05-11
Supplement: 41467_2021_22618_MOESM1_ESM.pdf [file 41467_2021_22618_MOESM1_ESM.pdf]

## **Supplementary Information**

# **FUT8-mediated aberrant N-glycosylation of B7H3 suppresses the immune response in triple-negative breast cancer**

**Huang et al.**

## Supplementary Figures

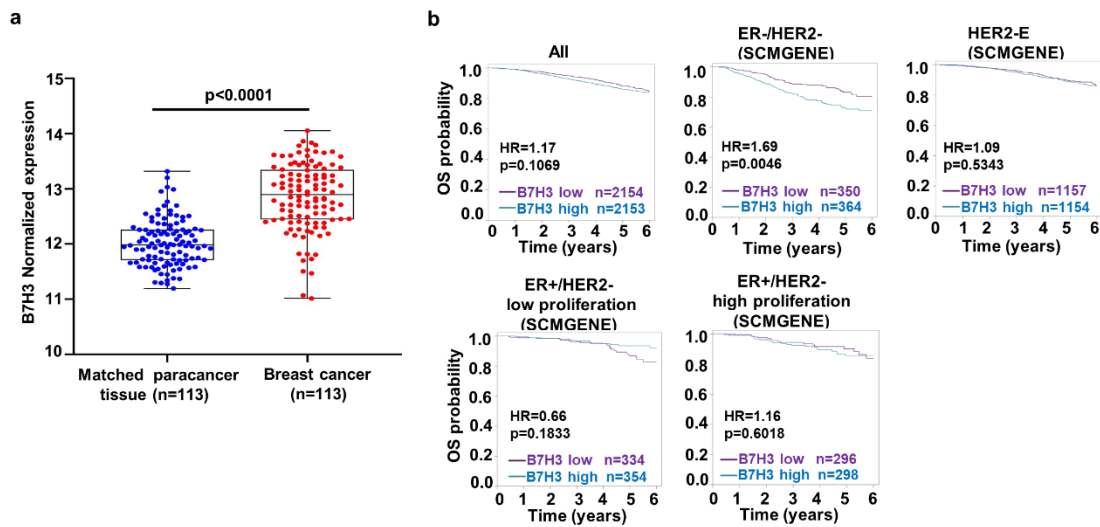

**Supplementary Fig. 1 B7H3 overexpression is associated with poor disease outcome in TNBC patients.** **a** The dysregulated B7H3 expression in the TCGA cohort. A total of 113 pairs of breast cancer and matched adjacent normal samples were obtained. The TCGA mRNA expression data (raw counts) were retrieved from Gene Expression Omnibus (GSE62944) and further normalized using DESeq2 variance-stabilizing transformation. Box plots: dot, per sample; hinges, 25th and 75th percentiles; middle line, median; whiskers, minimum to maximum value. The  $p$  value was determined by Wilcoxon matched-pairs signed rank test(two-sided). **b** Kaplan-Meier analyses of OS based on B7H3 mRNA levels. The data were retrieved from Breast cancer Gene-Expression Miner v4.4 (<http://bcgenex.centregauducheau.fr/BC-GEM>). All patients were stratified according intrinsic breast cancer molecular subtypes based on SCMGENE as indicated. Median cutoff was chosen in the analysis. The  $p$  value was assessed using the log-rank test(two-sided).

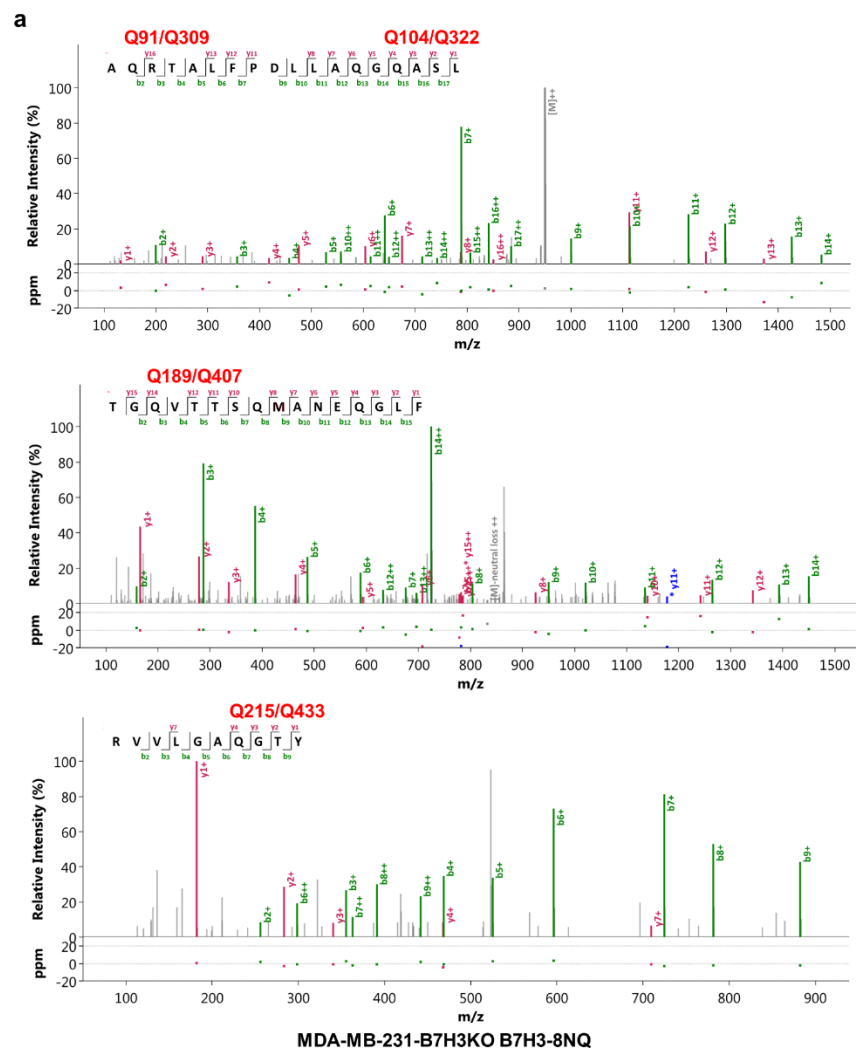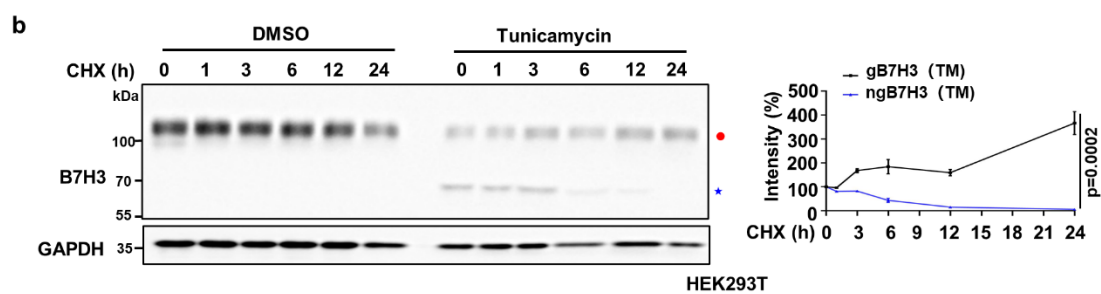

**Supplementary Fig. 2 N-glycosylation of B7H3 enhances its stability.** **a** Nano LC-MS/MS of the N-glycans of purified human B7H3 protein from the B7H3-8NQ re-expressed MDA-MB-231-B7H3KO cells. **b** Western blot analysis of glycosylated-B7H3 (gB7H3) and non-glycosylated-B7H3 (ngB7H3) protein degradation in HEK293T cells. Cells were treated with 20  $\mu$ M CHX at indicated intervals in the presence of tunicamycin (2.5  $\mu$ g/ml) or not. The intensity of B7H3 protein was quantified using ImageJ software. The  $p$  value in **b** was determined by a two-tailed unpaired Student's  $t$  test. Error bars represent mean  $\pm$  SD. All data are representative of three independent experiments. Red closed circle, glycosylated B7H3; Blue star, non-glycosylated B7H3.

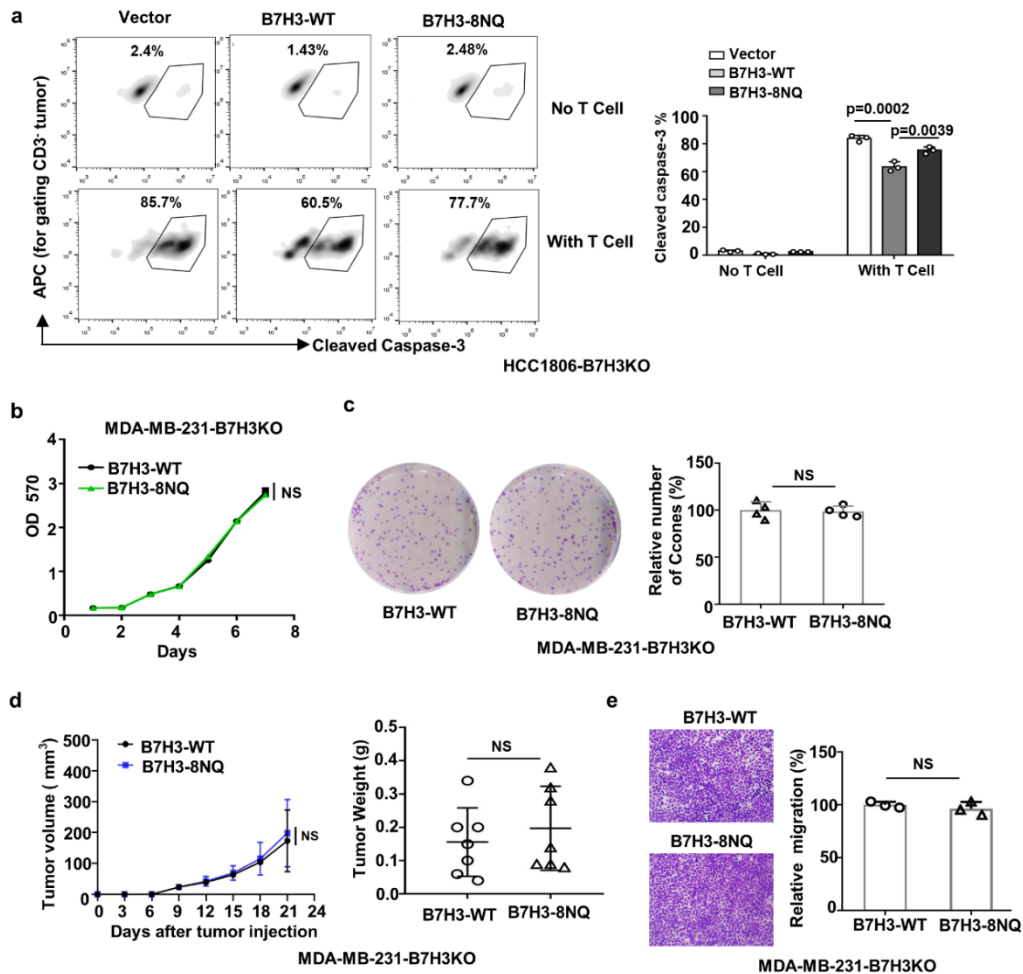

**Supplementary Fig. 3 The effect of glycosylation of B7H3 on tumorigenesis in TNBC cells. (a)** The indicated HCC1806-B7H3KO cells were co-cultured with CD3/CD28-activated human T lymphocyte cells. Left, representative dot plots of the cleavage of caspase-3 in tumor cells measured by flow cytometry. Right, percentage of cleaved caspase-3<sup>+</sup> tumor cells (n= 3 biological independent samples). **(b)** Growth curves of the indicated MDA-MB-231-B7H3KO cells were subjected to MTT assays for 7 days (n=3 biological independent samples). **(c)** The indicated MDA-MB-231-B7H3KO cells were subjected to clonogenic survival assays for 7 days. Representative images are shown (left). Quantification of clones in each group (right, n=4 biological independent samples). The clones of B7H3-WT cells were set as 100%. **(d)** Tumor growth of the indicated MDA-MB-231-B7H3KO xenografts in BALB/c SCID mice (n=7 mice per group). Tumor volumes were calculated (left). Tumor weights from experiment on autopsy on day 21 (right). **(e)** Quantitative analysis of the migratory ability in the indicated MDA-MB-231 B7H3KO cells. Representative images are shown (left). Quantification of migratory cells in each group (right, n= 3 biological independent samples). The migration of B7H3-WT cells was set as 100%. Error bars represent mean  $\pm$  SD. The *p* value in **a** was determined by one-way ANOVA with Dunnett's multiple comparisons test, no adjustments were made for multiple comparisons. The *p* value in **b-e** was determined by a two-tailed unpaired Student's *t* test. NS, not significance. Data are representative of three independent experiments.

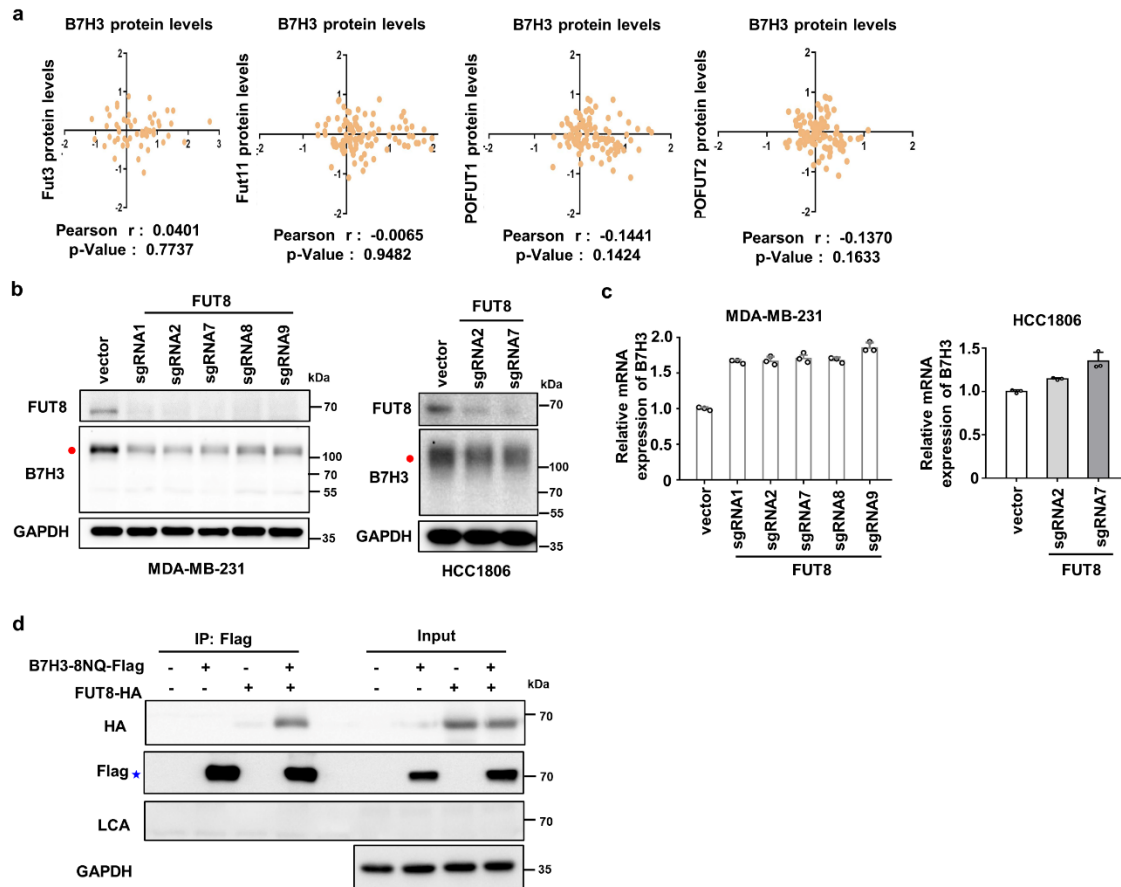

**Supplementary Fig. 4 FUT8 is involved in the core fucosylation process of B7H3 in TNBC cells.** **a** The correlation between B7H3 and fucosyltransferases (FUTs) at protein levels. Mass spectrometry-based proteomics data for TCGA samples were measured by The Clinical Proteomic Tumor Analysis Consortium (CPTAC), and were downloaded from CPTAC data portal (<https://proteomics.cancer.gov/data-portal>). The relationship was assessed using Pearson's chi-square test. **b-c** FUT8 was depleted using different specific single-guide RNAs (sgRNAs) in MDA-MB-231 and HCC1806 cells. The cell lysates were prepared for immunoblots (b). The B7H3 mRNA expression level was detected by qRT-PCR (n=3 biological independent samples) (c). Error bars represent mean  $\pm$  SD. **d** HEK293T cells were transiently transfected with Flag-tagged B7H3-8NQ and HA-tagged FUT8, followed by immunoprecipitation with anti-Flag beads and immunoblot analysis with anti-HA and LCA. Data are representative of three independent experiments. Red closed circle, glycosylated B7H3; Blue star, non-glycosylated B7H3.

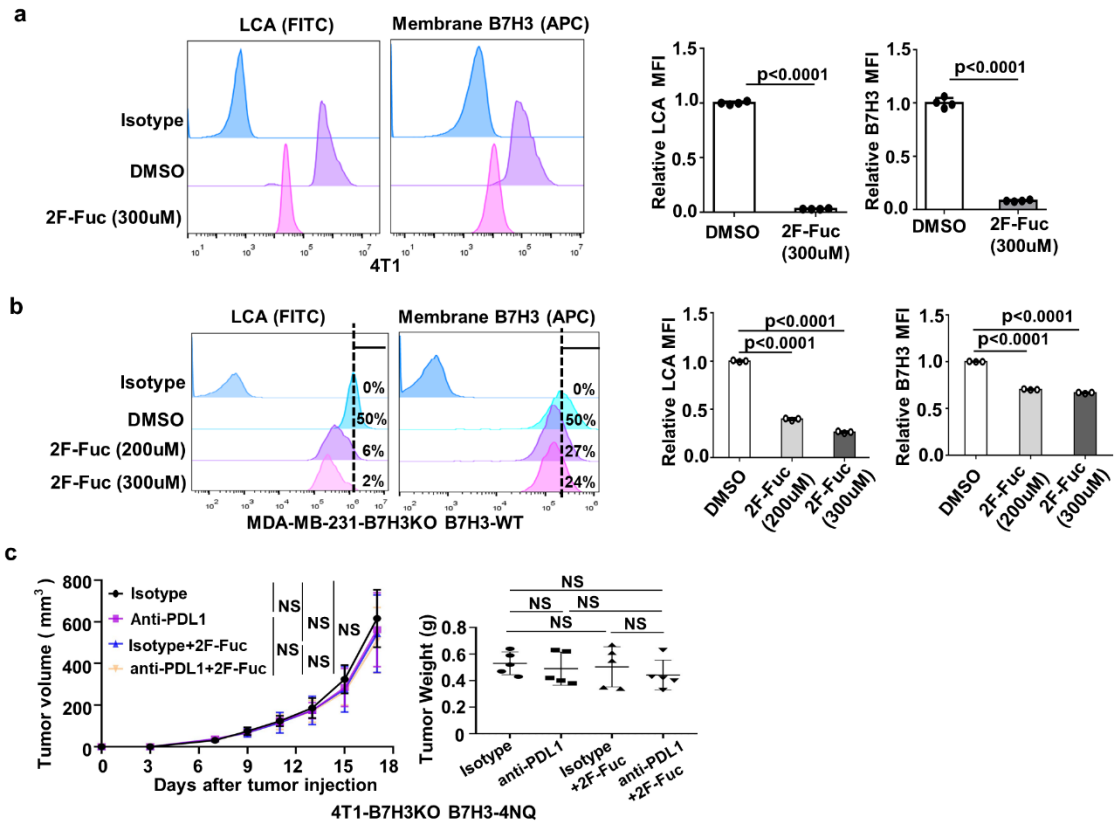

**Supplementary Fig. 5 2F-Fuc inhibits B7H3 core fucosylation in TNBC cells.** **a,b** Left, representative flow cytometry measuring LCA core fucose binding and B7H3 on the cell membrane of the indicated cells with 2F-Fuc for 4 days. Right, the relative B7H3 and LCA MFI in cells (**a**,  $n = 4$  biological independent samples; **b**,  $n = 3$  biological independent samples). **c** Tumor growth of B7H3-4Nq re-expressed 4T1-B7H3KO cells in BALB/c mice following treatment with 2F-Fuc treatment and anti-PDL1 antibody ( $n = 5$  mice per group). Tumor volumes were calculated (left), and tumor weights from experiment on autopsy (right). Error bars represent mean  $\pm$  SD. The  $p$  value in **a** was determined by a two-tailed unpaired Student's  $t$  test. The  $p$  value in **b** was determined by one-way ANOVA with Dunnett's multiple comparisons test, the  $p$  value in **c** was determined by one-way ANOVA with Tukey's multiple comparisons test, no adjustments were made for multiple comparisons. NS, not significance. Data are representative of two independent experiments.

**Supplementary Table 1. Univariate and multivariate analysis of potential prognostic factors in TNBC patients based on overall survival**

| Factors                   | Univariate |                 |                            | Multivariate |                 |                            |
|---------------------------|------------|-----------------|----------------------------|--------------|-----------------|----------------------------|
|                           | HR         | 95%CI           | <i>p</i> value (two-sided) | HR           | 95%CI           | <i>p</i> value (two-sided) |
| Age (> 40 vs. ≤ 40 years) | 0.699      | 0.342~<br>1.428 | 0.326                      | -            | -               | -                          |
| T stage (T3-T4 vs. T1-T2) | 2.261      | 1.058~<br>4.833 | 0.035                      | 1.831        | 0.847~<br>3.959 | 0.124                      |
| N stage (N2-N3 vs. N0-N1) | 2.466      | 1.241~<br>4.902 | 0.010                      | 2.905        | 1.417~<br>5.956 | 0.004                      |
| Grade (3 vs. 1+2)         | 1.355      | 0.689~<br>2.666 | 0.378                      | -            | -               | -                          |
| Chemotherapy (Yes vs. No) | 1.341      | 0.473~<br>3.800 | 0.581                      | -            | -               | -                          |
| B7H3 (high vs. low)       | 2.135      | 1.045~<br>4.361 | 0.037                      | 2.589        | 1.239~<br>5.412 | 0.011                      |

**Supplementary Table 2. Identification of N-linked glycosylation sites of purified human B7H3 protein from wild-type B7H3 re-expressed MDA-MB-231B7H3KO cells**

| # | position | Charge | Peptides                   | Mod_Sites*                                                                          | Spectra Mass | Theory Sq Mass | Delta Mass | Delta Mass (PP M) | Missed cleavages | PSM Scan number |
|---|----------|--------|----------------------------|-------------------------------------------------------------------------------------|--------------|----------------|------------|-------------------|------------------|-----------------|
| 1 | 91/309   | 2      | ANRTAL<br>FPDLLA<br>QGNASL | 2,Deamida<br>ted <sup>18</sup> O(1)[N];<br>15,Deamidated<br>_ <sup>18</sup> O(1)[N] | 1877.99      | 1877.97        | 0.01131    | 6.02              | 4                | 62902           |
| 2 | 104/322  | 2      | AQGNAS<br>LRL              | 4,Deamidated_<br><sup>18</sup> O(1)                                                 | 932.51       | 932.5          | 0.00084    | 0.91              | 1                | 31531           |
| 3 | 189/407  | 2      | TGNVTTS<br>QMANE<br>QGLF   | 3,Deamidated_<br><sup>18</sup> O(1)[N]                                              | 1700.78      | 1700.77        | 0.00977    | 5.74              | 2                | 53820           |
| 4 | 215/433  | 2      | RVVLGA<br>NGTYSC<br>L      | 7,Deamidated_<br><sup>18</sup> O(1)[N];12,C<br>arbamidomethy<br>I[C]#0              | 1412.71      | 1412.71        | 0.00354    | 2.51              | 2                | 44170           |

\* The Deamidated(<sup>18</sup>O) unmodified peptides were not detected, indicating that the occupancy of N-glycosylation sites was 100%.



**Supplementary Table 3. The mRNA expression of 13 fucosyltransferases genes in the 113 pairs breast Cancer cohort from TCGA database**

| <b>Gene Symbol</b> | <b>Full name</b>                | <b>Tumor/Normal ratio</b> | <b>Adjusted <i>p</i> value</b> |
|--------------------|---------------------------------|---------------------------|--------------------------------|
| FUT8               | fucosyltransferase 8            | 2.394                     | 9.25E-38                       |
| FUT2               | fucosyltransferase 2            | 2.963                     | 2.30E-18                       |
| FUT7               | fucosyltransferase 7            | 3.163                     | 1.69E-17                       |
| FUT3               | fucosyltransferase 3            | 2.944                     | 1.74E-09                       |
| FUT1               | fucosyltransferase 1            | 0.868                     | 0.049905663                    |
| FUT4               | fucosyltransferase 5            | 0.666                     | 3.14E-14                       |
| FUT5               | fucosyltransferase 4            | 1.667                     | 0.001286986                    |
| FUT6               | fucosyltransferase 6            | 1.100                     | 0.74024951                     |
| FUT9               | fucosyltransferase 9            | 1.252                     | 0.266935343                    |
| FUT10              | fucosyltransferase 10           | 0.701                     | 1.87E-11                       |
| FUT11              | fucosyltransferase 11           | 1.123                     | 0.077024387                    |
| POFUT1             | Protein O-fucosyl transferase 1 | 1.236                     | 1.43E-08                       |
| POFUT2             | protein O-fucosyl transferase 2 | 1.072                     | 0.086223463                    |

Note: The gene expression fold change (tumor/normal ratio), and the adjusted *p* values (Benjamini-Hochberg adjustment) were calculated using R package DESeq2 (two-sided).

**Supplementary Table 4. Antibodies used in immunoblot and immunoprecipitation**

| <b>Antibody</b>              | <b>Company</b>            | <b>Catalog number</b> | <b>Lot number</b> |
|------------------------------|---------------------------|-----------------------|-------------------|
| Mouse B7H3                   | R&D                       | AF1397                | -                 |
| Human FUT8 Affinity Purified | R&D                       | AF5768                | CDDR021807<br>1   |
| Fuct-VIII(B-10)              | Santa Cruz                | sc-271244             | #C2912            |
| LcH                          | vector laboratories       | B-1045                | ZC1221            |
| HA                           | Cell Signaling Technology | 3724S                 | LOT 9             |
| Ub                           | Cell Signaling Technology | 3933S                 | LOT 6             |
| K48ub                        | Cell Signaling Technology | 4289S                 | LOT 2             |
| GAPDH                        | Proteintech               | 60004-1-Ig            | 10013030          |
| Flag                         | Sigma                     | F1804                 | SLBW5142          |
| Flag                         | Cell Signaling Technology | 14793S                | LOT 5             |
| Anti-mouse IgG, HRP-linked   | Proteintech               | SA00001-1             | 20000242          |
| Anti-rabbit IgG, HRP-linked  | Proteintech               | SA00001-2             | 20000258          |
| Anti-goat IgG, HRP-linked    | R&D                       | HAF017                | WVR2717021        |
| Human B7H3                   | R&D                       | AF1027                | HCM0216011-       |
| Human B7H3                   | Cell Signaling Technology | 14058S                | LOT 1             |

**Supplementary Table 5. Antibodies used in Flow cytometry analysis**

| <b>Antibody</b>                                    | <b>Company</b> | <b>Catalog number</b> | <b>Lot number</b> |
|----------------------------------------------------|----------------|-----------------------|-------------------|
| FITC Anti-Active Caspase-3 ( C92-605)              | BD Bioscience  | 559341                | 3207905           |
| PE/Dazzle™ 594 anti-mouse CD4( GK1.5)              | Biolegend      | 100456                | B241659           |
| Alexa Fluor 647 Anti-mouse IFN- $\gamma$ ( XMG1.2) | BD Bioscience  | 557735                | 8263646           |
| PerCP/Cy5.5 anti-mouse CD8a(53-6.7)                | BD Bioscience  | 551162                | 8243587           |
| APC/Cy7 anti-mouse CD45(30-F11)                    | Biolegend      | 103116                | B242535           |
| APC anti-mouse CD3(17A2)                           | Biolegend      | 100235                | B198729           |
| APC anti-human CD3(UCHT1)                          | Biolegend      | 300439                | B230114           |
| PerCP/Cy5.5 anti-human CD8a(SK1)                   | Biolegend      | 344710                | B311545           |
| APC anti-human CD4(RPA-T4)                         | Tonbo          | 20-0049-              | C0049072          |
|                                                    | Biosciences    | T125                  | 617202            |
| Anti-human IL-2 APC (MQ1-17H12)                    | eBioscience    | 17-7029-              | 4303346           |
|                                                    |                | 82                    |                   |
| FITC anti-human/mouse Granzyme B(GB11)             | Biolegend      | 515403                | B200874           |
| Fluorescein Lens Culinaris Agglutinin              | Vector         | FL-1041               | ZD0104            |
| PE anti-human CD276 (B7H3)(DCN.70)                 | Biolegend      | 331606                | B320314           |
| Alexa Fluor 647 Anti-Mouse CD276(MIH32)            | BD Bioscience  | 562862                | 9080794           |
| PE anti-mouse CD49b (pan-NK cells)(DX5)            | Biolegend      | 108907                | B271645           |
| PE anti-human IFN- $\gamma$ (4S.B3)                | Biolegend      | 502509                | B285989           |
| APC anti-human CD276 (7-517)                       | eBioscience    | 17-2769-              | 2149396           |
|                                                    |                | 42                    |                   |

**Supplementary Table 6 The clinicopathologic characteristics in TNBC patients**

| <b>Patients characteristics</b> | <b>No. of cases (%)</b> |
|---------------------------------|-------------------------|
| Age (years)                     |                         |
| $\geq 40$                       | 112(74.7)               |
| $<40$                           | 38(25.3)                |
| T classification                |                         |
| T1                              | 39 (26.0)               |
| T2                              | 88 (58.7)               |
| T3                              | 15 (10.0)               |
| T4                              | 8 (5.3)                 |
| N classification                |                         |
| N0                              | 74(49.3)                |
| N1                              | 43(28.7)                |
| N2                              | 15(10.0)                |
| N3                              | 18(12.0)                |
| Grade                           |                         |
| 1+2                             | 69(46.0)                |
| 3                               | 81(54.0)                |
| Chemotherapy                    |                         |
| Yes                             | 129(86.0)               |
| No                              | 21(14.0)                |
